# Supplementary material for: Genetic Analysis of Citrobacter sp.86 Reveals Involvement of Corrinoids in Chlordecone and Lindane Biotransformations
Source: Front Microbiol. 2020 Nov 9;11:590061. doi: 10.3389/fmicb.2020.590061 (PMC7680753; doi:10.3389/fmicb.2020.590061)
Supplement: Supplementary file 2 [file Data_Sheet_2.xlsx]

## Sheet: chlordecone
GC-MS peak areas of chlordecone degradation by Citrobacter sp.86 and its knock-out mutants in MMpyt medium
File name	Incubation time (days)	CLD	A1	B1	B3-B4		CLD =	chlordecone
							A1 =	10-monohydrochlordecone
Simple mutation							B1 =	2,4,5,6,7-pentachloroindene
ΔcobQUS							B3-B4 =	2,4,6,7-tetrachloroindene and 2,4,5,7-tetrachloroindene
03CLD046P	0	46257368					WT =	wild type
03CLD048Q	7	20297926		201908
03CLD051A	14	2283180		19716159	1731447
03CLD052T	21	7593088	127459	93533992	4944177
03CLD054P	28	17860665	412118	48657537	1643758
03CLD056Z	42	22966314	754948	115418767	3746499
03CLD063U	126	3402216	377704	47167250
03CLD068S	134	38867489	17504441	992732296	18087235
03CLD074K	201	12247168	20121299	994433735
03CLD046Q	0	38804829
03CLD048R	7	46683041		352595
03CLD051B	14	2806426		18748660	1618852
03CLD052U	21	8393302	144830	82709968	4482407
03CLD054Q	28	18517906	451842	52016543	1766179
03CLD057A	42	21044355	760677	102384386	3224188
03CLD063V	126	4308955	506257	57982131	936372
03CLD068T	134	35514885	19501728	988897222	14385157
03CLD074L	201	9528266	17326802	1132688796
ΔcobST
03CLD046R	0	60870437
03CLD048S	7	100482205		5630814	594847
03CLD051C	14	4010761		31959319	1495956
03CLD052V	21	8849824	184294	147106696	4607465
03CLD054R	28	19166674	760886	75843642	1453484
03CLD057B	42	10819061	582837	182129829	3842775
03CLD063W	126	1853227	414432	108275274	1031680
03CLD068U	134	4677474	10820725	940189852	9549475
03CLD046S	0	62575457
03CLD048T	7	88946309		6020152	684307
03CLD051D	14	3371120		30236491	1389336
03CLD052W	21	7673423	162200	153275286	4789780
03CLD054S	28	18039288	753205	79590986	1587558
03CLD057C	42	8545158	467341	185720270	3593781
03CLD063X	126	1404326	347440	117599968	1090790
03CLD068V	134	5592951	12863852	1035966266	12199566
ΔcbiHJK
03CLD046T	0	92580430
03CLD048U	7	122656736
03CLD051E	14	42030561
03CLD052X	21	43390717
03CLD054T	28	41288369
03CLD057D	42	59197854		48814
03CLD061I	63	57310875		655500
03CLD063Y	126	28465575
03CLD068W	134	221212932	546536	156389
03CLD074M	201	551717222	4000089	1834553
03CLD046U	0	90264860
03CLD048V	7	53214331
03CLD051F	14	25163994
03CLD052Y	21	37046071
03CLD054U	28	33561040
03CLD057E	42	70570914
03CLD061J	63	76643134	123370	771758
03CLD063Z	126	33582086
03CLD068X	134	253889438	560419	207939
03CLD074N	201	410567443	2192067	1004508
ΔcbiK
03CLD046V	0	69138190
03CLD048W	7	62272641
03CLD051G	14	21503006
03CLD052Z	21	46601144
03CLD054V	28	27330099
03CLD057F	42	47594389
03CLD061K	63	82409940	113336	904885
03CLD064A	126	25243879
03CLD068Y	134	273562548	422565	2218354
03CLD074O	201	388753069	1520879	684796
03CLD046W	0	68486391
03CLD048X	7	97570478
03CLD051H	14	7765742
03CLD053A	21	57507570
03CLD054W	28	29642012
03CLD057G	42	45829207		48450
03CLD061L	63	82727015		844423
03CLD064B	126	21169060
03CLD068Z	134	251438850	436924	679481
03CLD074P	201	301824575	1619276	659791
Double mutation
ΔmetE ΔcobQUS
03CLD047B	0	165429612
03CLD049C	7	98073251		1040164
03CLD051M	14	28555625	108385	19570249	1118644
03CLD053F	21	11535243	112202	32963371
03CLD055B	28	36450020	621156	47100100	1323001
03CLD057L	42	25762201	576187	67592564	1759518
03CLD064G	126	9783280	493939	25786619	334596
03CLD069E	134	36198970	4900073	446810921	3666367
03CLD047C	0	180444453
03CLD049D	7	90130489		1685106	261282
03CLD051N	14	61870635	206517	26243984	1562745
03CLD053G	21	45309290	518637	97556944	3971640
03CLD055C	28	28753219	585372	42105118	1175240
03CLD057M	42	26121630	609315	71382867	1636502
03CLD064H	126	8172222	436094	20161039	245740
03CLD069F	134	80664075	12234016	546703433	5715550
ΔmetE ΔcobST
03CLD047D	0	245455356
03CLD049E	7	35279412		1544957	248732
03CLD051O	14	15837274	284123	75421994	6312172
03CLD053H	21	11767823	469283	155160913	7238339
03CLD055D	28	22735770	791312	105604296	3549204
03CLD057N	42	6188933	448423	170249507	3935498
03CLD064I	126	2218495	382578	41385778	606323
03CLD069G	134	24195970	14374819	699759566	11013289
03CLD047E	0	86167304
03CLD049F	7	29572820		3662519	666775
03CLD051P	14	9119326	228642	63427672	5072741
03CLD053I	21	15653106	584261	167155790	8603681
03CLD055E	28	15898688	576682	115412948	3839210
03CLD057O	42	8667111	667662	150895295	3527371
03CLD064J	126	2959177	529034	60383594	830067
03CLD069H	134	17804681	10074148	707973056	11173380
ΔmetE ΔcbiHJK
03CLD047F	0	77348847
03CLD049G	7	32104594
03CLD051Q	14	124969064
03CLD053J	21	38736327
03CLD055F	28	38912488
03CLD057P	42	42785234
03CLD061M	63	49780856		623451
03CLD064K	126	23019417
03CLD069I	134	217949004	373695	200697
03CLD074Q	201	313482225	981742	477802
03CLD047G	0	110202430
03CLD049H	7	39765359
03CLD051R	14	23032227
03CLD053K	21	45925880
03CLD055G	28	93053297
03CLD057Q	42	47117349
03CLD065C	63	22314636
03CLD064L	126	27364465
03CLD069J	134	265757933	398079	179474
03CLD074R	201	377664344	1253957	488281
ΔmetE ΔcbiK
03CLD047H	0	87510788
03CLD049I	7	38009583
03CLD051S	14	94828081
03CLD053L	21	38170399
03CLD055H	28	79337202
03CLD057R	42	42997854
03CLD065D	63	24277135
03CLD064M	126	17029902
03CLD069K	134	198808675	305227
03CLD074S	201	316854149	966302	211504
03CLD047I	0	56545083
03CLD049J	7	48246977
03CLD051T	14	40366349
03CLD053M	21	69855640
03CLD055I	28	42923034
03CLD057S	42	48513328
03CLD065E	63	23226885
03CLD064N	126	19532149
03CLD069L	134	232453676	374739
03CLD074T	201	422250591	1351963	589086
Positive controls
WT
03CLD046X	0	69497642
03CLD048Y	7	51985280		258924
03CLD051I	14	7463928	120545	32368264	2630800
03CLD053B	21	20124626	680868	139535513	9696984
03CLD054X	28	18731342	895824	74645166	2927264
03CLD057H	42	23345087	1117596	146609460	5087075
03CLD064C	126	5329132	812942	109450760	1833879
03CLD069A	134	30138100	18805748	833038982	22824335
03CLD046Y	0	167596528
03CLD048Z	7	36378032		319375
03CLD051J	14	4197155		26119851	2734934
03CLD053C	21	18897273	659177	132313871	9168459
03CLD054Y	28	19205748	876667	72892208	2849198
03CLD057I	42	19135342	986467	140782807	4971705
03CLD064D	126	7771816	967070	115069634	1924511
03CLD069B	134	33711008	21743827	928769249	34557667
ΔmetE
03CLD046Z	0	80248719
03CLD049A	7	56890747		260118
03CLD051K	14	14360170	118211	27609809	1899172
03CLD053D	21	22665681	555081	127256030	8314192
03CLD054Z	28	27384023	948475	195014812	8777867
03CLD057J	42	25060421	1007850	136975508	4429707
03CLD064E	126	3808159	553323	91670447	1427969
03CLD069C	134	53988540	24634146	939006039	20187155
03CLD047A	0	81272796
03CLD049B	7	97848383		735249
03CLD051L	14	9700806	99899	35231353	2786016
03CLD053E	21	22077571	663503	127986282	7898524
03CLD055A	28	26474482	943544	123204512	5476680
03CLD057K	42	31417510	1150469	138056029	4277181
03CLD064F	126	4039315	585768	88550724	1315541
03CLD069D	134	20042738	11039734	936041694	21627268
Negative controls (abiotic)
03CLD047R	0	86861576
03CLD049S	7	99800252
03CLD052C	14	76690896
03CLD053V	21	42529841
03CLD055R	28	91096217
03CLD058B	42	71641380
03CLD064W	126	19146243
03CLD069U	134	143186750
03CLD047S	0	88369676
03CLD049T	7	106567916
03CLD052D	14	73861194
03CLD053W	21	120517877
03CLD055S	28	103914391
03CLD058C	42	51271148
03CLD064X	126	20963480
03CLD069V	134	121469132

## Sheet: lindane
HS-GC-MS peak areas of lindane degradation by Ctrobacter sp.86-1 and its knock-out mutants in MMpyt medium
File name	Incubation time (days)	lindane	C6Cl4H6	C6Cl5H5	C6Cl2H4*	C6Cl2H4	C6ClH5	C6H6		lindane =	g-hexachlorocyclohexane
										C6Cl4H6 =	3,4,5,6-tetrachlorocyclohex-1-ene
Simple mutation										C6Cl5H5 =	1,3,4,5,6-pentachlorocyclohex-1-ene
ΔcobQUS										C6Cl2H4* =	1,4-dichlorobenzene
03CLD119H	0	8079247		92206				118662		C6Cl2H4 =	1,3-dichlorobenzene
03CLD119X	1	7822400	55792	38566	30061	249259	63491	145663		C6ClH5 =	chlorobenzene
03CLD120Z	4	6117757	338673	35556	66709	340000	1374302	285870		C6H6 =	benzene
03CLD123R	7	5382531	1099727	58799	160013	496318	4286424	1017243		WT =	wild type
03CLD124K	13	12706138	6088810		1268531	2610273	49111176	3529513
03CLD127I	21	2000351	2383291		1661396	2293793	98757873	4726401		Peak areas were obtained from extract ion chromatograms for m/z = 181, 147, 146, 112, 78
03CLD128R	28				214435	236909	34100181	8833182
03CLD119I	0	7508866		97585				106981
03CLD119Y	1	7877688	50599	33154	26625	208201	58281	125985
03CLD121A	4	6507843	365850	33957	57970	298904	1200799	256987
03CLD123S	7	5418251	997364	54529	178289	536701	4345260	3789574
03CLD124L	13	8687009	5789302		1494184	3264801	64787617	3726137
03CLD127J	21	2542159	2685677		1865164	2600327	110058850	5167277
03CLD128S	28				248943	245137	33474463	8882991
ΔcbiHJK
03CLD119J	0	9025833		110981				102386
03CLD119Z	1	6117757	33873	35558	66709	340000	137402	118946
03CLD121B	4	6452268	36412	32266	74458	318405	217989	145793
03CLD123T	7	6501094	62639	93501	94736	443675	46036	176827
03CLD124M	13	17957063	369689	560840	512333	3345579	1614602	1773807
03CLD127K	21	10321610	361377	652469	347865	1785287	764480	303087
03CLD128T	28	14009270			393285	3129712	1286484	566720
03CLD119K	0	9202328		106413				125890
03CLD120A	1	6507843	36850	33957	57970	298904	120099	105890
03CLD121C	4	6740779	30342	39096	75551	325639	212174	124572
03CLD123U	7	6413224	52999	96434	106340	475979	374721	215678
03CLD124N	13	13718334	329931	486888	467295	3045825	1363190	1994059
03CLD127L	21	10413571	344390	793870	383059	2058515	832771	317759
03CLD128U	28	14837038			409120	2891625	1251764	530210
ΔcbiK
03CLD119L	0	8954399		96661				125485
03CLD120B	1	8077687		34373	60526	328482	71012	148596
03CLD121D	4	6214591	52790	24005	114075	733433	658988	145896
03CLD123V	7	5636396	45876	130578	98601	540406	302316	215896
03CLD124O	13	14155363	284807	580689	507095	3756010	1297167	1217215
03CLD127M	21	10835491	262811	654407	239617	1330508	546342	414216
03CLD128V	28	14125192	370122	425518	157367	1162726	576665	355167
03CLD119M	0	7265478		52721				145896
03CLD120C	1	7573483		43729	49381	274767	60709	102398
03CLD121E	4	5461280	43575	32115	72190	459854	311902	148965
03CLD123W	7	5536961	48134	138090	101371	513457	292786	214859
03CLD124P	13	15692687	274417	550937	615203	4180853	1468973	846674
03CLD127N	21	10214279	271504	642419	202933	1158253	532454	329553
03CLD128W	28	13535037	297954	417231	188474	1384025	738908	443595
Positive control
WT
03CLD119F	0	8869079		84570				125485
03CLD119V	1	8006751	44676	53643	23966	156299	36126	148596
03CLD120X	4	6040730	556064	21108	212207	479040	1916064	145896
03CLD123P	7	4603499	2506767	32833	351722	779969	34150036	215896
03CLD124I	13	2835052	3707007		1523000	1618776	251911312	19525896
03CLD127G	21	369672			66314	86450	10390850	3728529
03CLD128P	28						899001	998652
03CLD119G	0	9219943		97063				125485
03CLD119W	1	8317251	47255	52722	23737	161981	40778	148596
03CLD120Y	4	6731594	548298	31363	68574	372611	1661581	145896
03CLD123Q	7	4905771	2316248	41653	317055	560557	23768170	215896
03CLD124J	13	2767398	3605582		1601705	1652183	267758149	21533717
03CLD127H	21				48049	56043	10357875	3808971
03CLD128Q	28						876522	972235
Negative controls (abiotic)
pH = 7.5
03CLD119N	0	7574118		242990				12548
03CLD120D	1	7886983		379474	7712	20670		159875
03CLD121F	4	6352503		1127891	19172	114260	22890	156987
03CLD123X	7	6928688		1432556	13331	91545	24325	179245
03CLD124Q	13	16901056		4433227		194482	160074	684863
03CLD127O	21	12919280		4165302		246430	205324	375534
03CLD128X	28	14346344		4240213			155534	281106
03CLD119O	0	8108770		276463				12548
03CLD120E	1	7680746		388975	5319	21283		159875
03CLD121G	4	6008302		990365	23667	129195	20911	156987
03CLD123Y	7	6587432		1544959	16418	80851	19869	179245
03CLD124R	13	15988337		3499345		154378	97088	936130
03CLD127P	21	16344472		4768093		221937	186779	357237
03CLD128Y	28	13464726		3871020			188749	375027
pH = 7
03CLD141M	0	6509315		565204				207673
03CLD141Q	1	1568147		132097			21355	57564
03CLD141X	4	3108404		124475			35337	70422
03CLD142K	21	5030867		137369			12651	71253
pH = 8
03CLD141L	0	5482540		761316				174440
03CLD141P	1	1633487		388319		21611	25987	62964
03CLD141W	4	2672460		117425		88333	41350	74028
03CLD142J	21	4606547		3451656	87012	627990	70291	77427
pH = 9
03CLD141K	0	5953190		539899				171856
03CLD141O	1	1779225		416433		56615	24268	58572
03CLD141V	4	2164595		1129312	49567	363785	63307	66728
03CLD142I	21	4141397		3775887	216138	1508901	217212	140535

## Sheet: OD_600
Growth monitoring (by optical density at 600 nm) of Citrobacter sp.86 and selected knock-out mutants in MMpyt medium
Sample name	Incubation time (hours)
	0	1	2	3	4	4.75	5.75	25	29.75	33.5	54	79	175	223	367	415
	Incubation time (days)
	0	0.0416667	0.0833333	0.125	0.166667	0.197917	0.239583	1.04167	1.23958	1.39583	2.25	3.29167	7.29167	9.29167	15.2917	17.2917
WT_1	0.004	0.04	0.08	0.19	0.36	0.45	0.51	0.54	0.55	0.54	0.52	0.53	0.32	0.34	0.32	0.28
WT_2	0.001	0.03	0.07	0.12	0.32	0.42	0.52	0.57	0.53	0.54	0.57	0.51	0.34	0.31	0.3	0.26
WT_average	0.0025	0.035	0.075	0.155	0.34	0.435	0.515	0.555	0.54	0.54	0.545	0.52	0.33	0.325	0.31	0.27
WT_standard-deviation	0.00212132	0.00707107	0.00707107	0.0494975	0.0282843	0.0212132	0.00707107	0.0212132	0.0141421	0	0.0353553	0.0141421	0.0141421	0.0212132	0.0141421	0.0141421
WT_CLD_1	0.001	0.04	0.08	0.23	0.5	0.52	0.53	0.62	0.6	0.56	0.53	0.57	0.4	0.42	0.41	0.35
WT_CLD_2	0.005	0.04	0.07	0.18	0.43	0.48	0.61	0.59	0.62	0.58	0.56	0.61	0.48	0.46	0.47	0.38
WT_CLD_average	0.003	0.04	0.075	0.205	0.465	0.5	0.57	0.605	0.61	0.57	0.545	0.59	0.44	0.44	0.44	0.365
WT_CLD_standard-deviation	0.00282843	0	0.00707107	0.0353553	0.0494975	0.0282843	0.0565685	0.0212132	0.0141421	0.0141421	0.0212132	0.0282843	0.0565685	0.0282843	0.0424264	0.0212132
WT_lindane_1	0.015	0.04	0.07	0.15	0.44	0.5	0.54	0.52	0.53	0.52	0.62	0.51	0.36	0.37	0.33	0.3
WT_lindane_2	0.021	0.04	0.08	0.15	0.37	0.42	0.48	0.49	0.5	0.48	0.5	0.47	0.31	0.34	0.31	0.29
WT_lindane_average	0.018	0.04	0.075	0.15	0.405	0.46	0.51	0.505	0.515	0.5	0.56	0.49	0.335	0.355	0.32	0.295
WT_lindane_standard-deviation	0.00424264	0	0.00707107	0	0.0494975	0.0565685	0.0424264	0.0212132	0.0212132	0.0282843	0.0848528	0.0282843	0.0353553	0.0212132	0.0141421	0.00707107
DcobQUS_1	0.018	0.03	0.05	0.11	0.21	0.32	0.6	0.42	0.53	0.48	0.48	0.55	0.28	0.26	0.24	0.23
DcobQUS_2	0.005	0.04	0.08	0.18	0.28	0.38	0.59	0.43	0.47	0.46	0.46	0.45	0.23	0.24	0.29	0.26
DcobQUS_average	0.0115	0.035	0.065	0.145	0.245	0.35	0.595	0.425	0.5	0.47	0.47	0.5	0.255	0.25	0.265	0.245
DcobQUS_standard-deviation	0.00919239	0.00707107	0.0212132	0.0494975	0.0494975	0.0424264	0.00707107	0.00707107	0.0424264	0.0141421	0.0141421	0.0707107	0.0353553	0.0141421	0.0353553	0.0212132
DcobQUS_CLD_1	0.014	0.04	0.12	0.23	0.42	0.49	0.56	0.52	0.49	0.67	0.71	0.62	0.29	0.3	0.31	0.24
DcobQUS_CLD_2	0.004	0.03	0.06	0.14	0.27	0.37	0.5	0.46	0.43	0.53	0.56	0.42	0.24	0.28	0.29	0.22
DcobQUS_CLD_average	0.009	0.035	0.09	0.185	0.345	0.43	0.53	0.49	0.46	0.6	0.635	0.52	0.265	0.29	0.3	0.23
DcobQUS_CLD_standard-deviation	0.00707107	0.00707107	0.0424264	0.0636396	0.106066	0.0848528	0.0424264	0.0424264	0.0424264	0.0989949	0.106066	0.141421	0.0353553	0.0141421	0.0141421	0.0141421
DcobQUS_lindane_1	0.007	0.04	0.07	0.12	0.35	0.41	0.53	0.53	0.52	0.51	0.49	0.39	0.28	0.24	0.27	0.2
DcobQUS_lindane_2	0.01	0.04	0.07	0.13	0.37	0.57	0.55	0.54	0.51	0.5	0.53	0.49	0.23	0.22	0.23	0.19
DcobQUS_lindane_average	0.0085	0.04	0.07	0.125	0.36	0.49	0.54	0.535	0.515	0.505	0.51	0.44	0.255	0.23	0.25	0.195
DcobQUS_lindane_standard-deviation	0.00212132	0	0	0.00707107	0.0141421	0.113137	0.0141421	0.00707107	0.00707107	0.00707107	0.0282843	0.0707107	0.0353553	0.0141421	0.0282843	0.00707107
DcbiK_1	0.008	0.05	0.1	0.2	0.53	0.55	0.67	0.67	0.67	0.67	0.69	0.62	0.38	0.37	0.36	0.32
DcbiK_2	0.011	0.04	0.1	0.2	0.45	0.56	0.59	0.54	0.55	0.55	0.6	0.51	0.33	0.33	0.34	0.29
DcbiK_average	0.0095	0.045	0.1	0.2	0.49	0.555	0.63	0.605	0.61	0.61	0.645	0.565	0.355	0.35	0.35	0.305
DcbiK_standard-deviation	0.00212132	0.00707107	0	0	0.0565685	0.00707107	0.0565685	0.0919239	0.0848528	0.0848528	0.0636396	0.0777817	0.0353553	0.0282843	0.0141421	0.0212132
DcbiK_CLD_1	0.002	0.04	0.1	0.31	0.43	0.63	0.63	0.66	0.64	0.66	0.67	0.55	0.43	0.42	0.4	0.37
DcbiK_CLD_2	0.001	0.05	0.09	0.2	0.5	0.58	0.56	0.61	0.6	0.61	0.57	0.53	0.37	0.38	0.37	0.35
DcbiK_CLD_average	0.0015	0.045	0.095	0.255	0.465	0.605	0.595	0.635	0.62	0.635	0.62	0.54	0.4	0.4	0.385	0.36
DcbiK_CLD_standard-deviation	0.000707107	0.00707107	0.00707107	0.0777817	0.0494975	0.0353553	0.0494975	0.0353553	0.0282843	0.0353553	0.0707107	0.0141421	0.0424264	0.0282843	0.0212132	0.0141421
DcbiK_lindane_1	0.006	0.05	0.09	0.2	0.48	0.54	0.59	0.59	0.67	0.59	0.55	0.51	0.32	0.34	0.32	0.29
DcbiK_lindane_2	0.01	0.05	0.1	0.2	0.42	0.49	0.61	0.62	0.68	0.62	0.58	0.54	0.34	0.36	0.35	0.27
DcbiK_lindane_average	0.008	0.05	0.095	0.2	0.45	0.515	0.6	0.605	0.675	0.605	0.565	0.525	0.33	0.35	0.335	0.28
DcbiK_lindane_standard-deviation	0.00282843	0	0.00707107	0	0.0424264	0.0353553	0.0141421	0.0212132	0.00707107	0.0212132	0.0212132	0.0212132	0.0141421	0.0141421	0.0212132	0.0141421
